# Supplementary material for: The C-Terminal Domain of Nefmut Is Dispensable for the CD8+ T Cell Immunogenicity of In Vivo Engineered Extracellular Vesicles
Source: PubMed Central journal article supplement (PMC8068889; doi:10.3390/vaccines9040373), 2021-04-12
Supplement: vaccines-09-00373-s001.pdf [file vaccines-09-00373-s001.pdf]

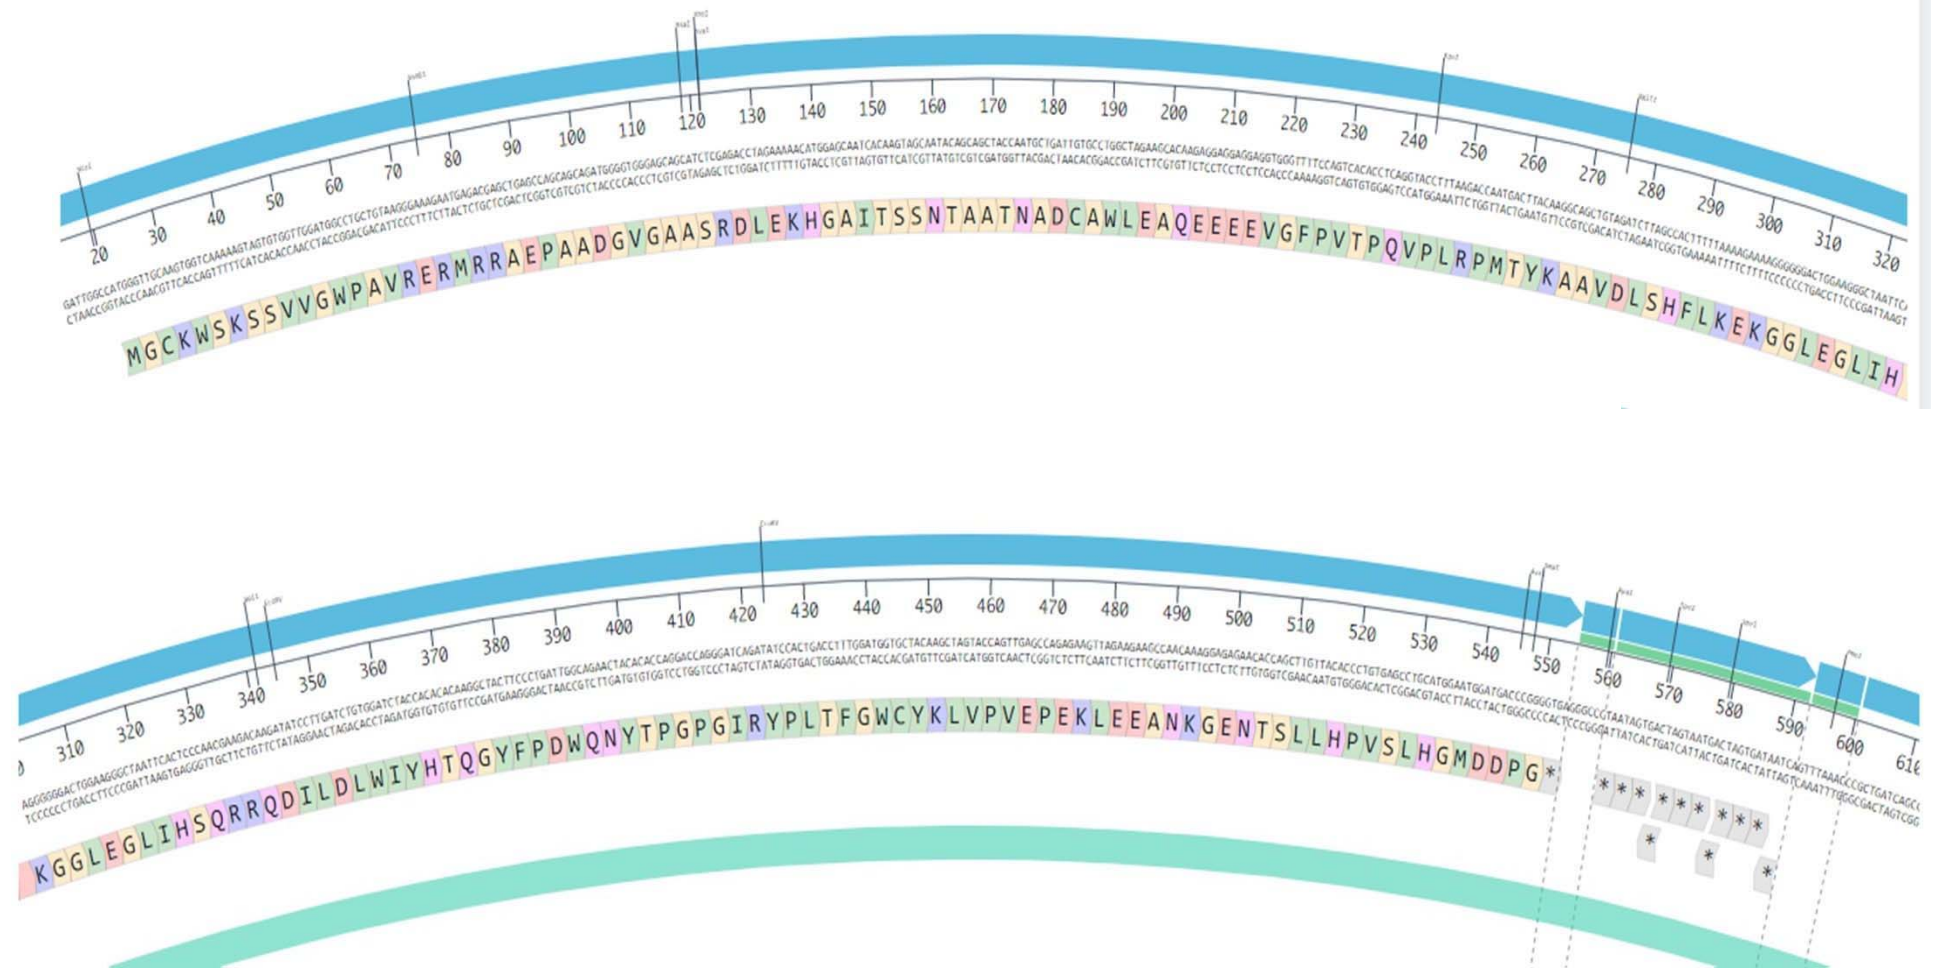

**Figure S1.** Both nucleotide and amino acid sequence of Nef<sup>mut</sup>PL.

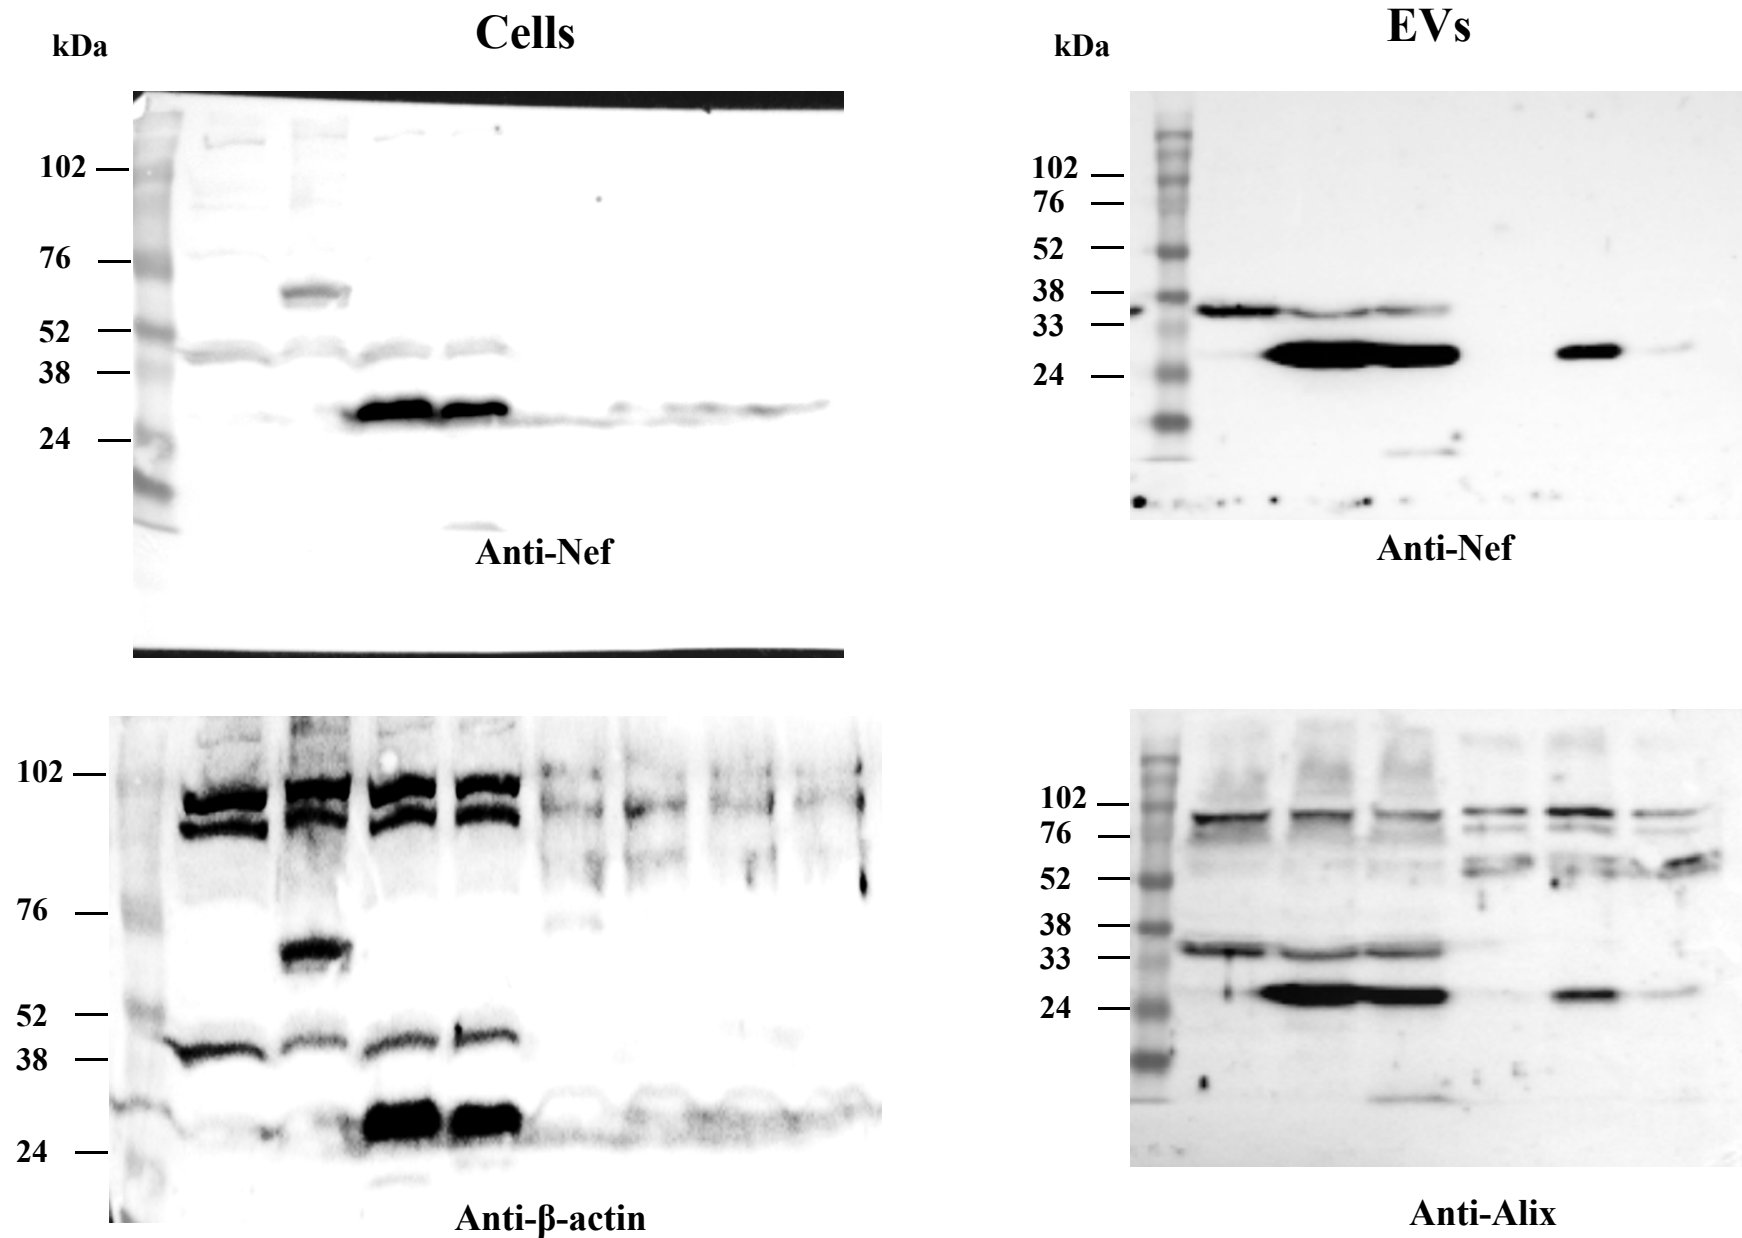

**Figure S2.** Western blot analysis for the expression of Nef<sup>mut</sup> and Nef<sup>mut</sup>PL in transfected HEK293T cells and respective EVs. Raw data.

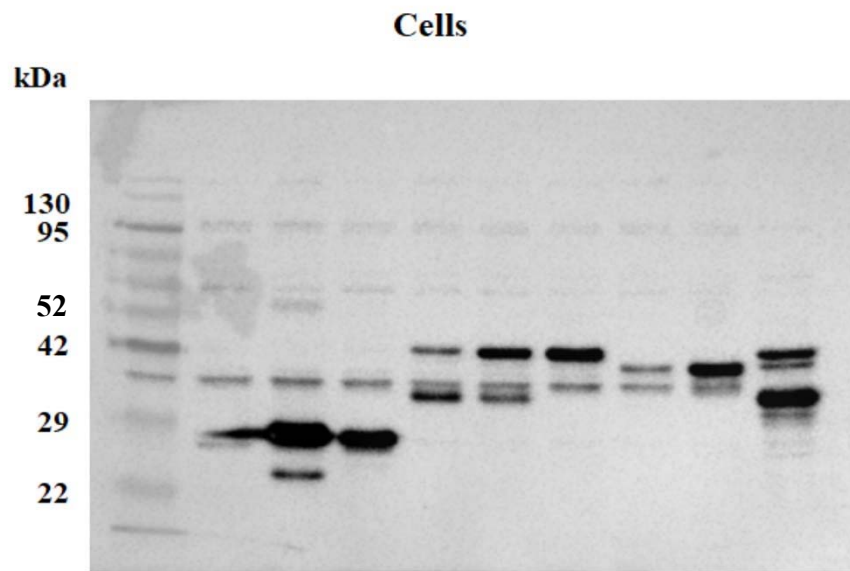

**Anti-Nef**

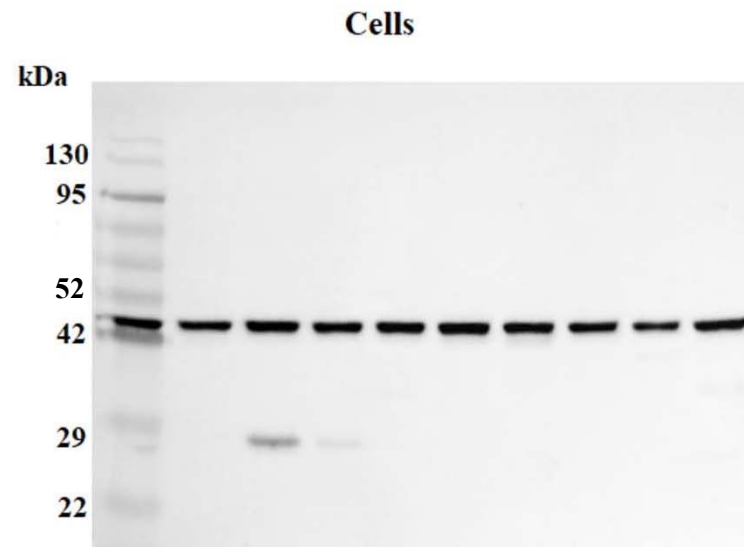

**Anti- $\beta$ -Actin**

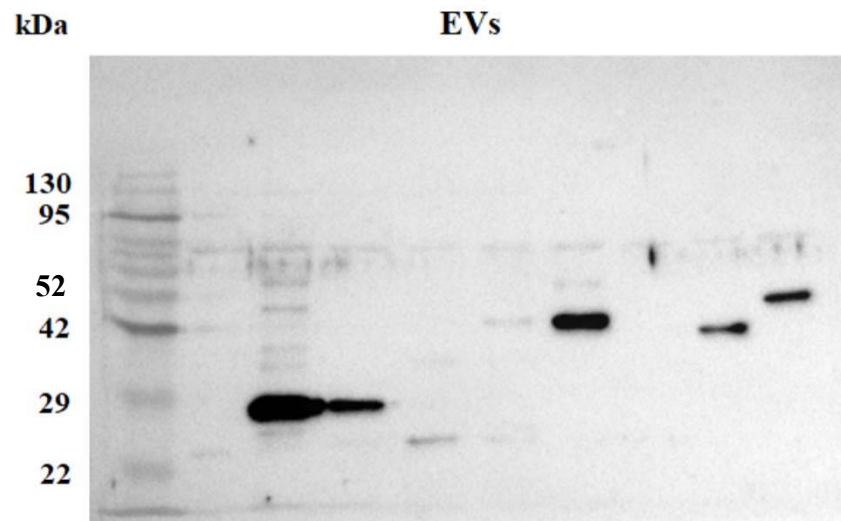

**Anti-Nef**

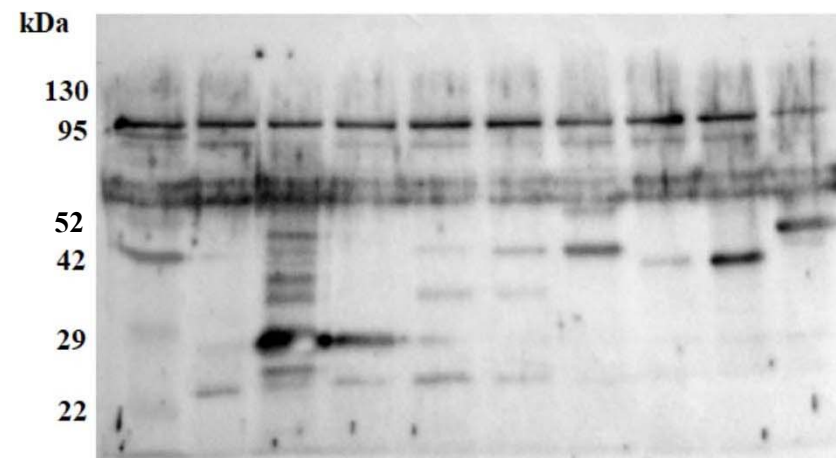

**Anti-Alix**

**Figure S3.** Western blot analysis for the expression of Nef<sup>mut</sup>/E6 and Nef<sup>mut</sup>PL/E6 in transfected HEK293T cells and respective EVs. Raw data.

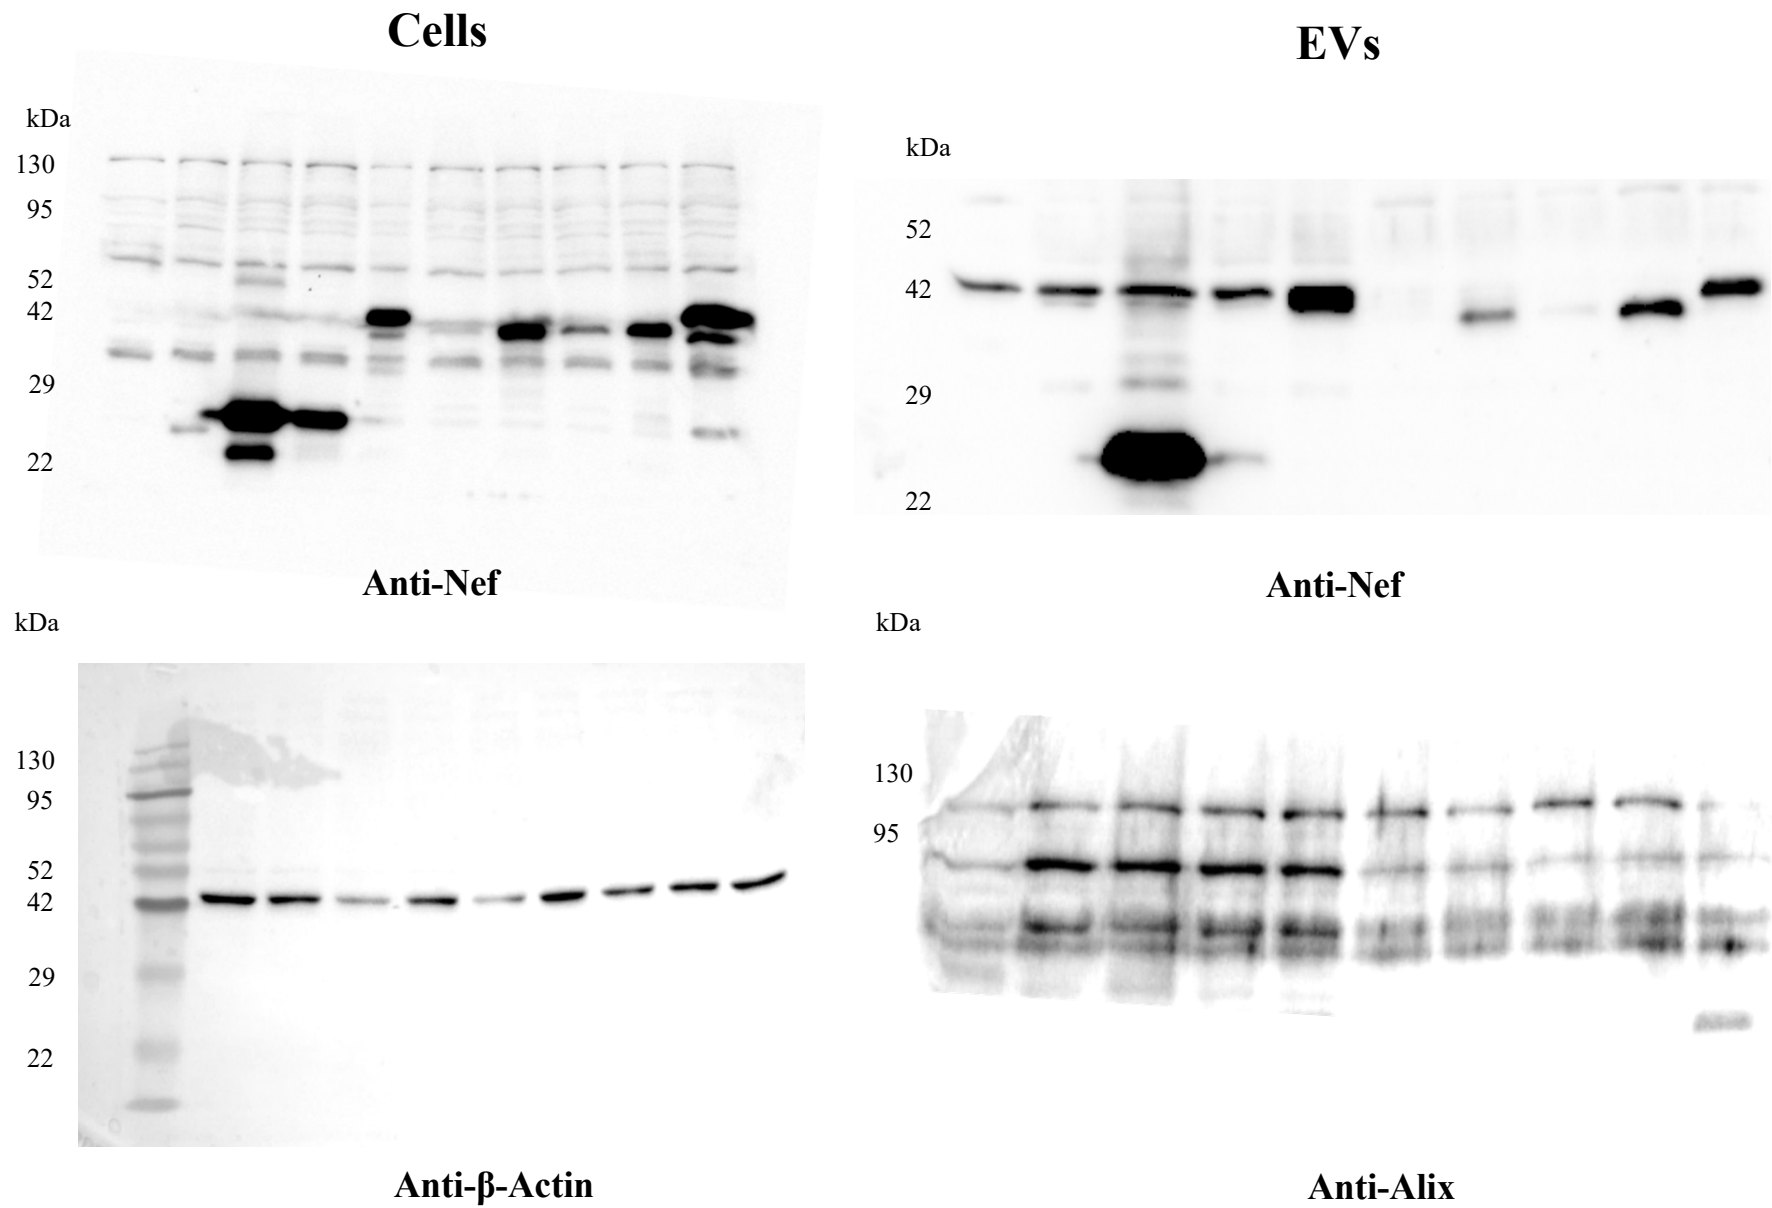

**Figure S4.** Western blot analysis for the expression of Nef<sup>mut</sup>/E7 and Nef<sup>mut</sup>PL/E7 in transfected HEK293T cells and respective EVs. Raw data.

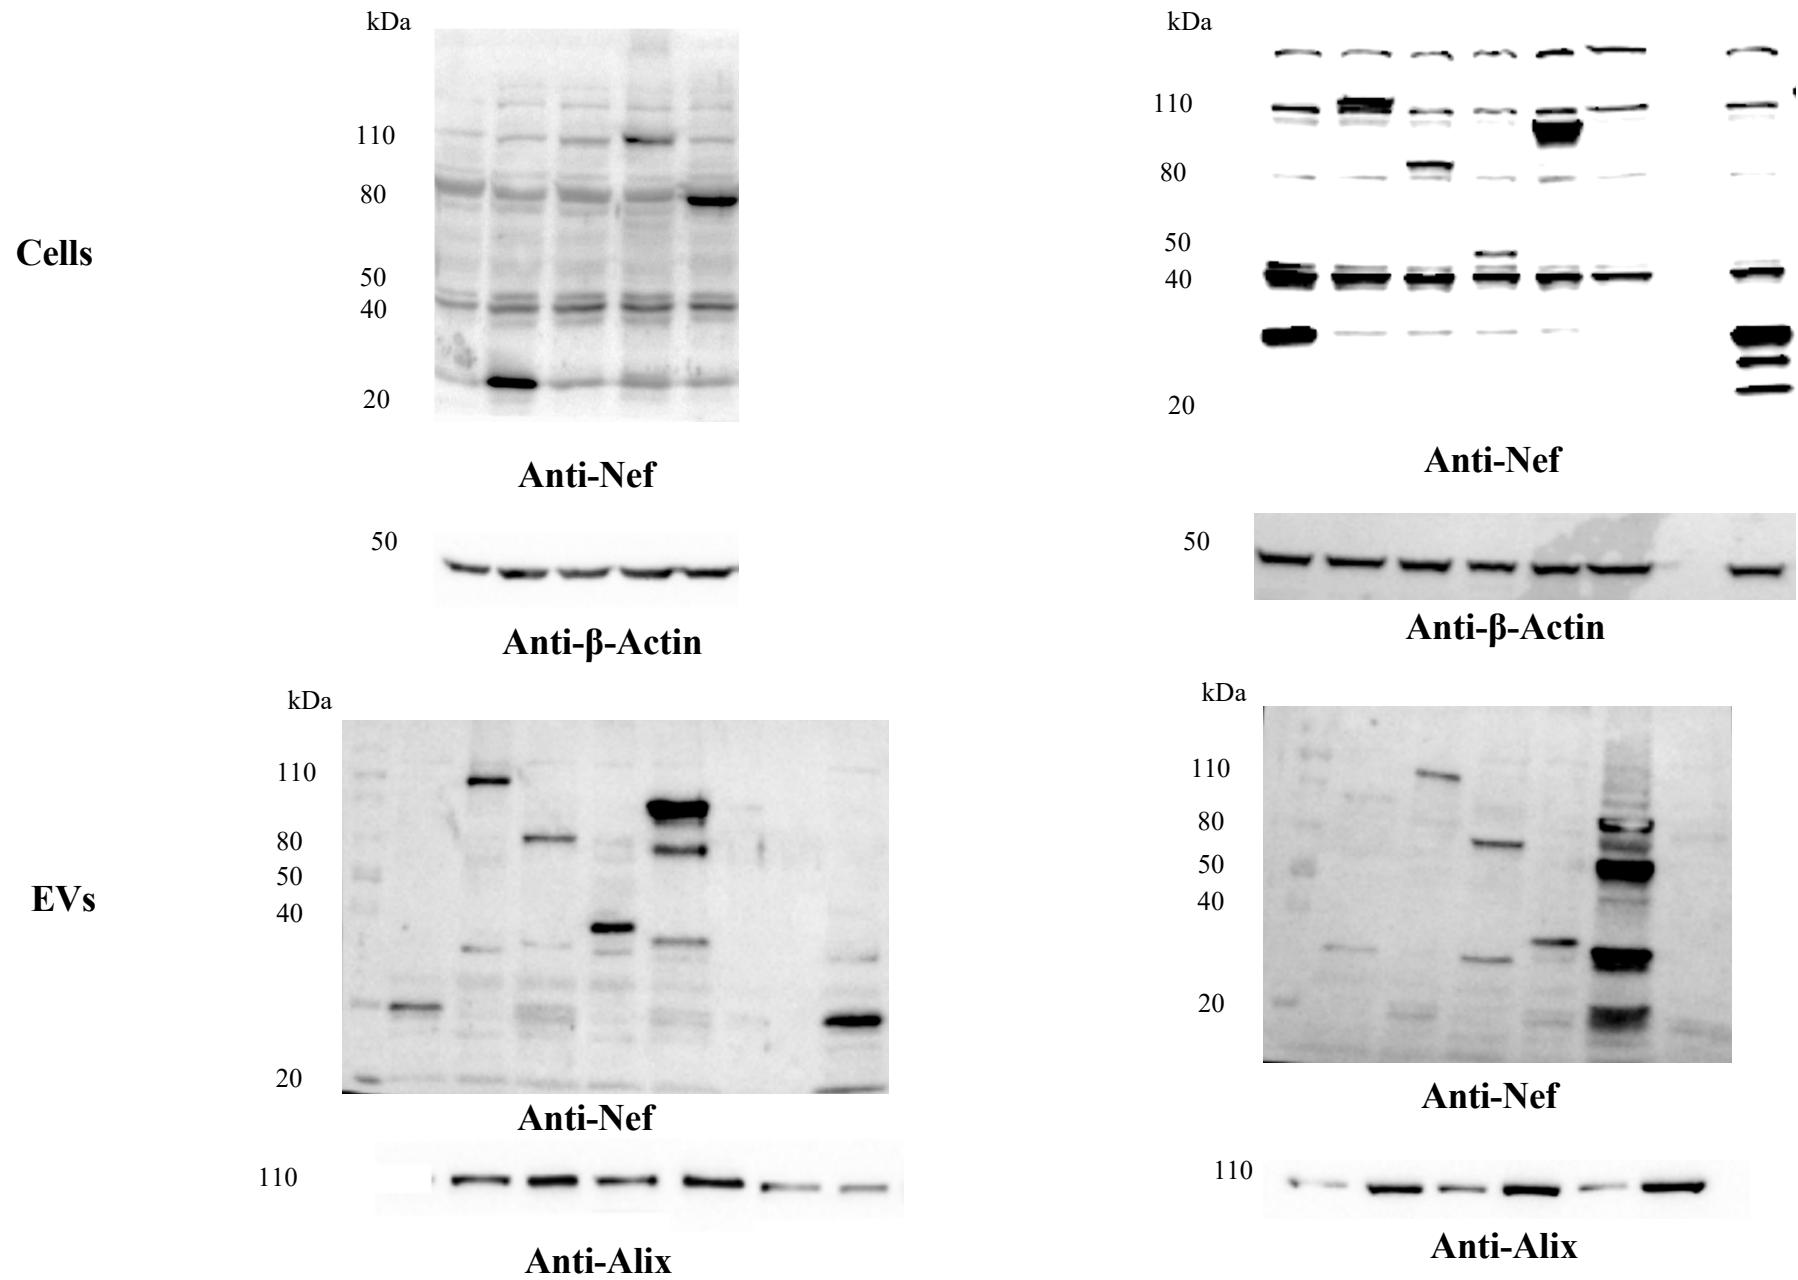

**Figure S5.** Western blot analysis for the expression of Nef<sup>mut</sup>/S1, Nef<sup>mut</sup>/S2 and Nef<sup>mut</sup>PL/S1 and Nef<sup>mut</sup>PL/S2 in transfected HEK293T cells and respective EVs. Raw data.
